# Supplementary material for: Microfluidic processing of HZSM-5 films in a capillary microreactor for the continuous acetalisation reaction of glycerol with acetone
Source: Royal Society of Chemistry journal article supplement (doi:10.1039/c9re00450e), 2020-01-01
Supplement: c9re00450e1.pdf [file c9re00450e1.pdf]

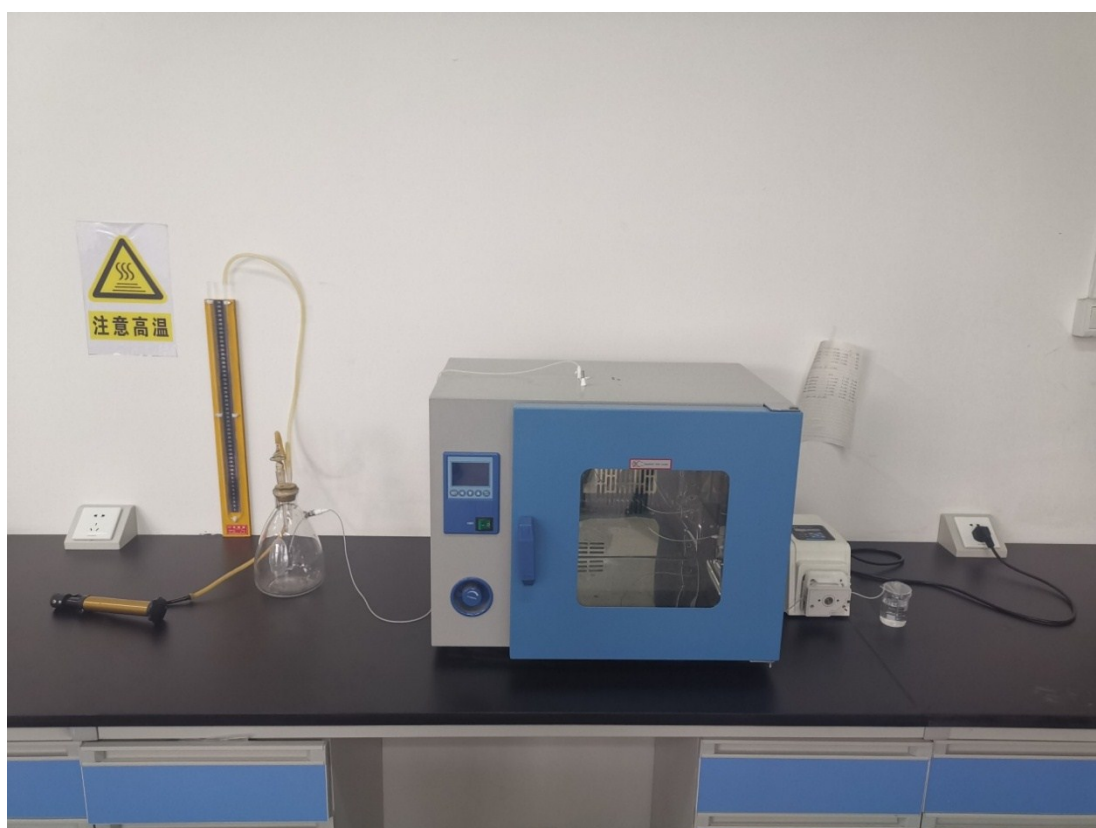

Figure S1 Real picture of the microfluidic device for preparing ZSM-5 zeolite film in capillary microreactor.

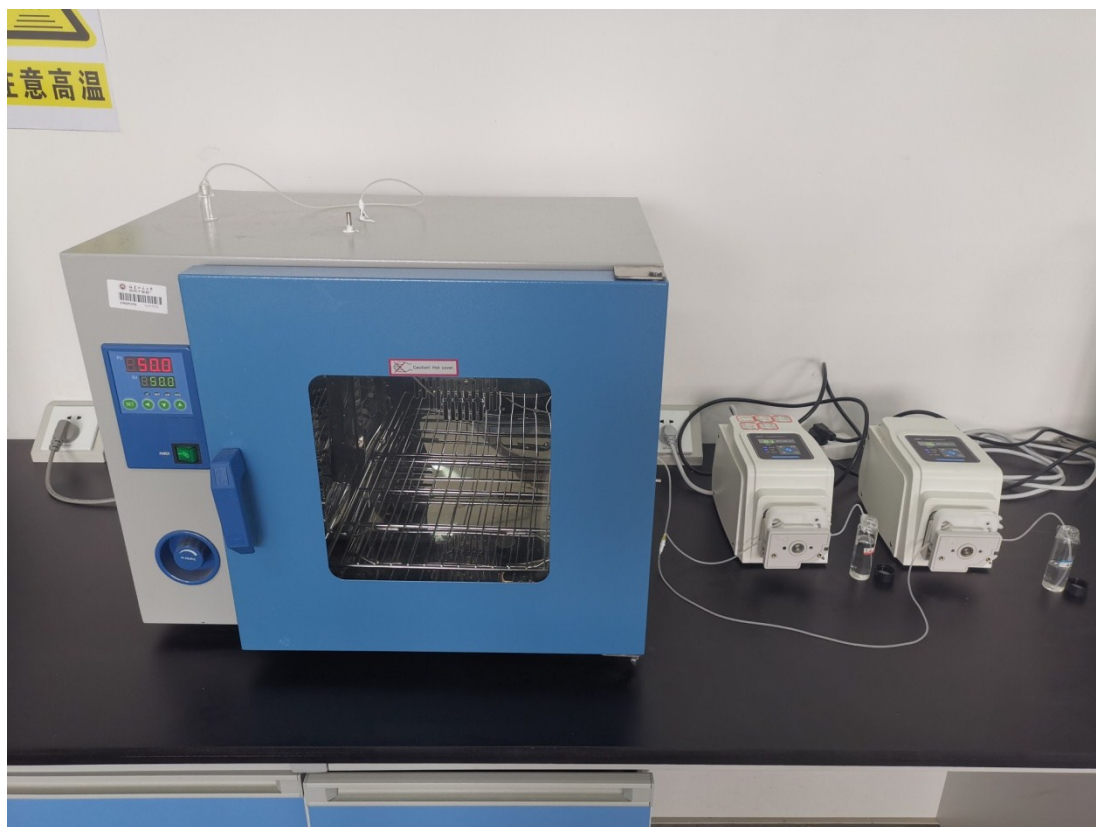

Figure S2 Real picture of the continuous flow catalytic acetalisation reaction device

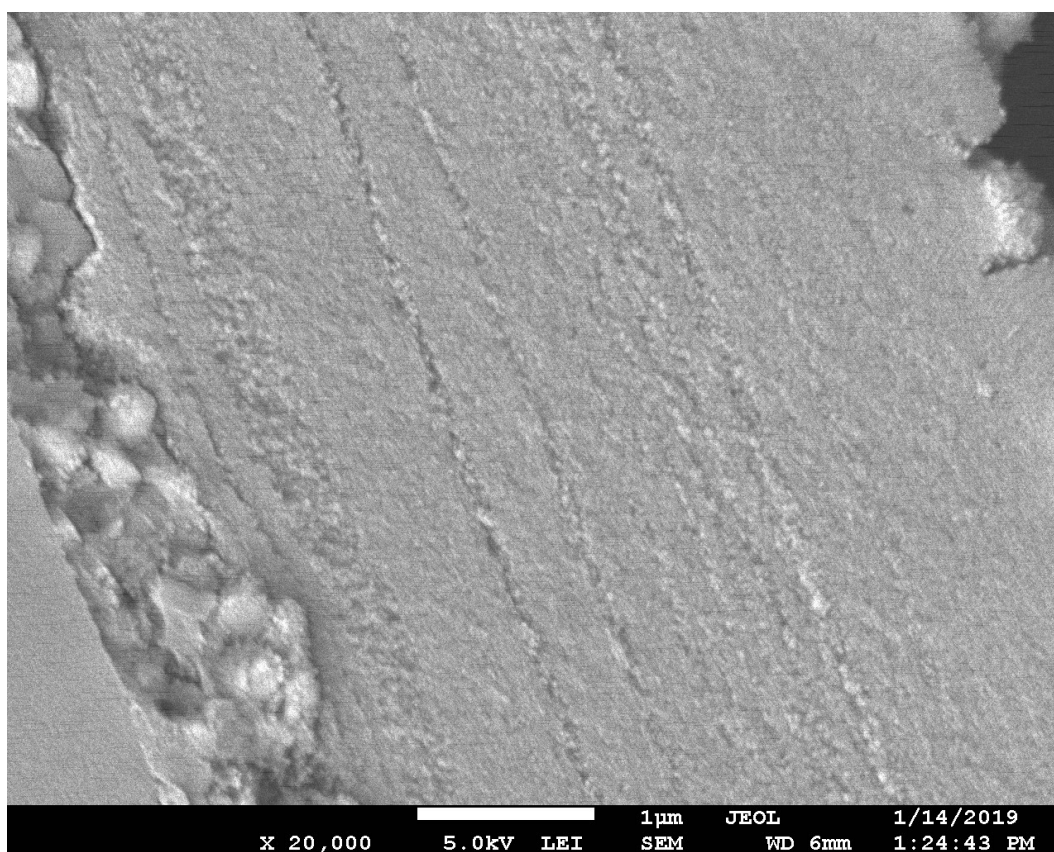

Figure S3-1 High resolution SEM image of Fig. 4(a)

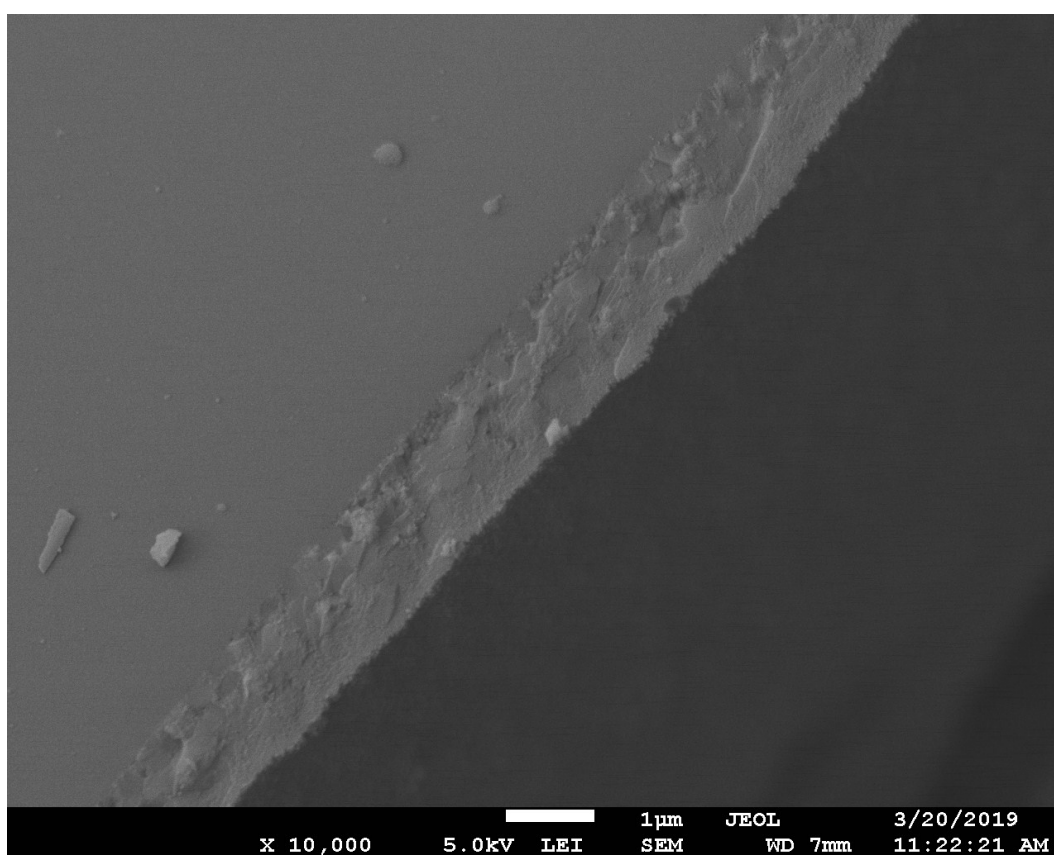

Figure S3-2 High resolution SEM image of Fig. 4(b)

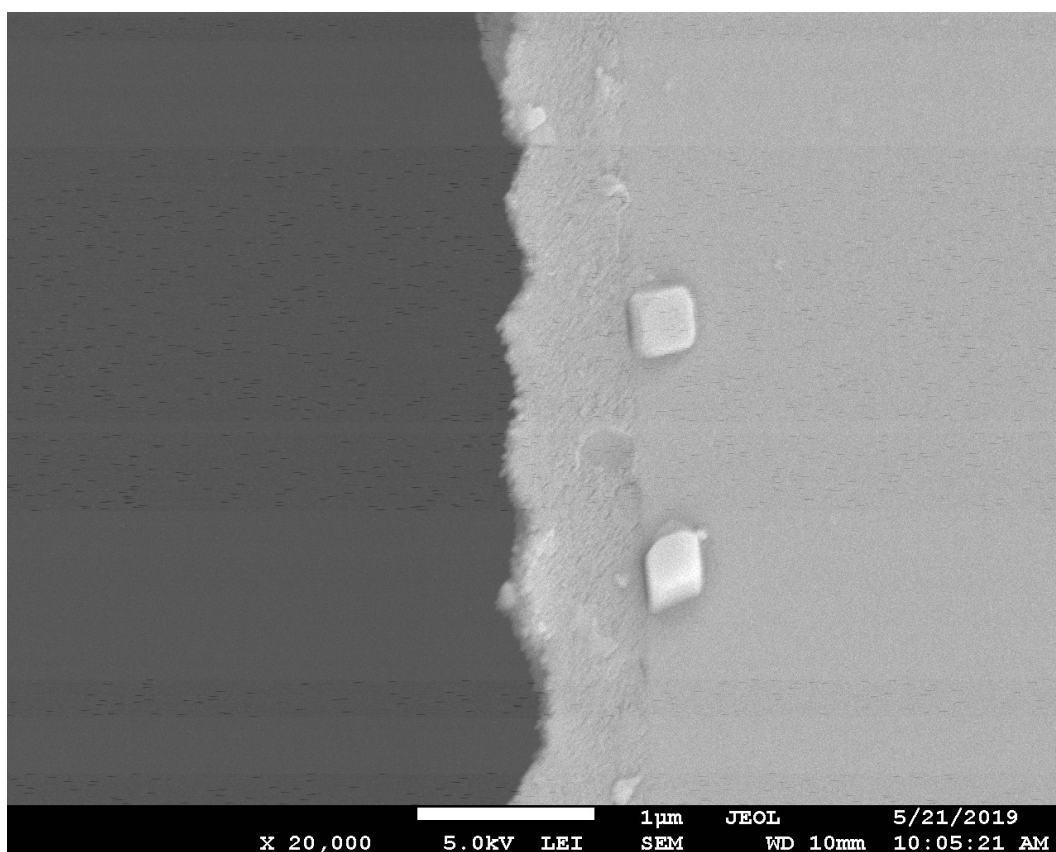

Figure S3-3 High resolution SEM image of Fig. 4(c)

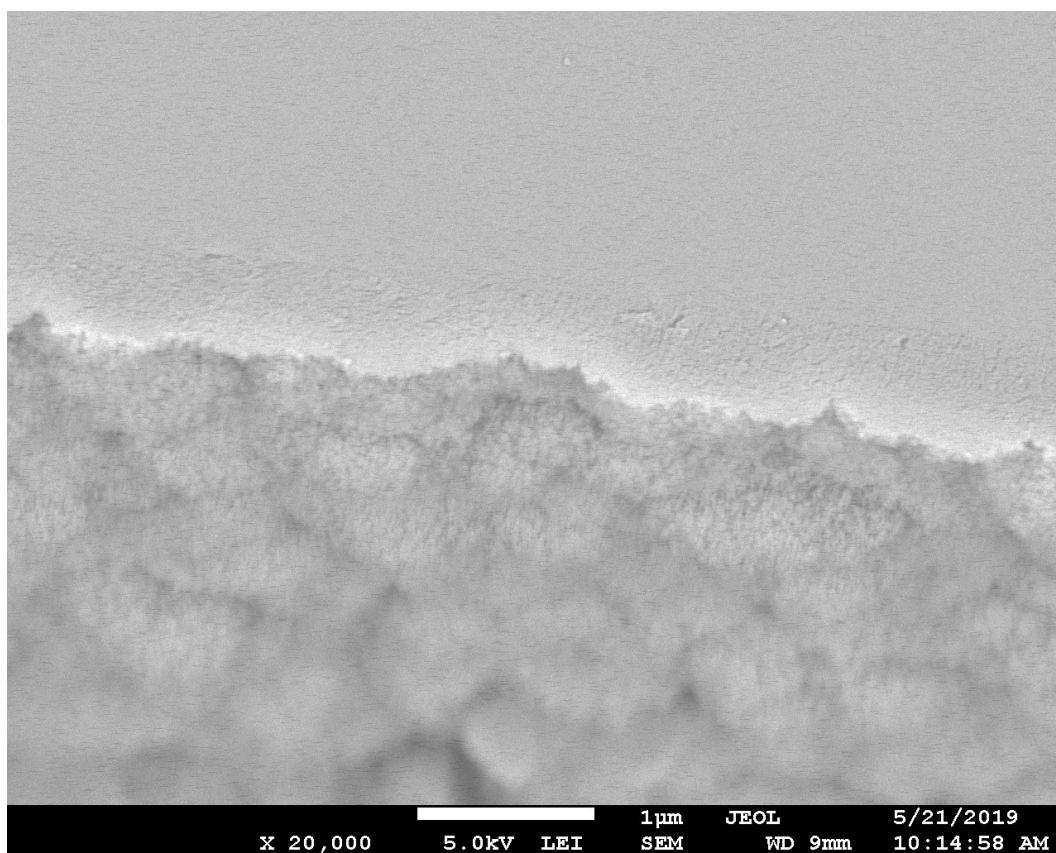

Figure S3-4 High resolution SEM image of Fig. 4(d)

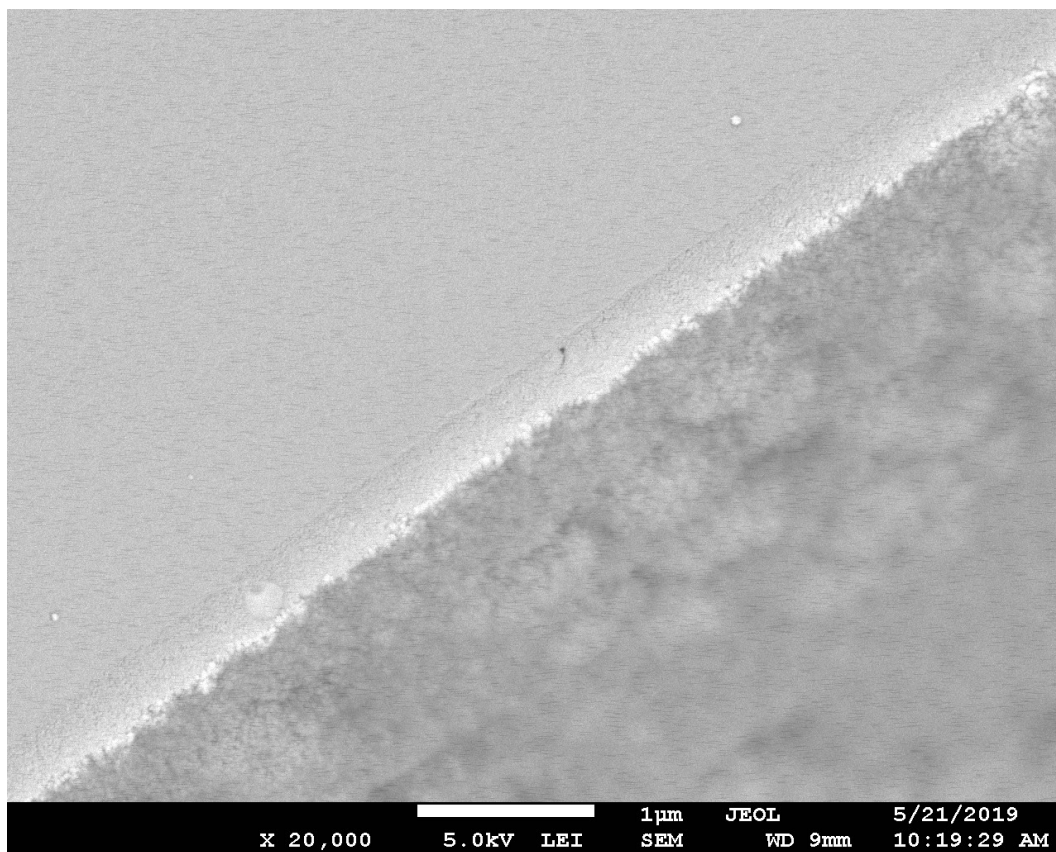

Figure S3-5 High resolution SEM image of Fig. 4(e)



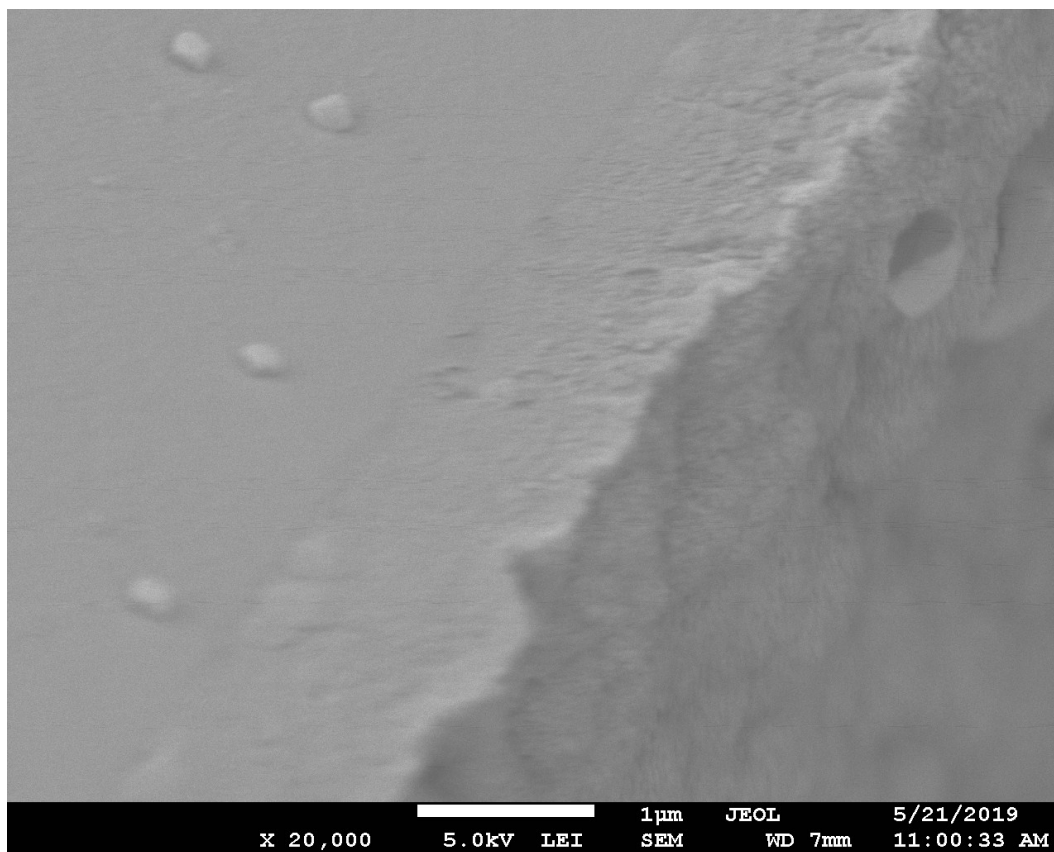

Figure S4-1 High resolution SEM image of Fig. 5(a)

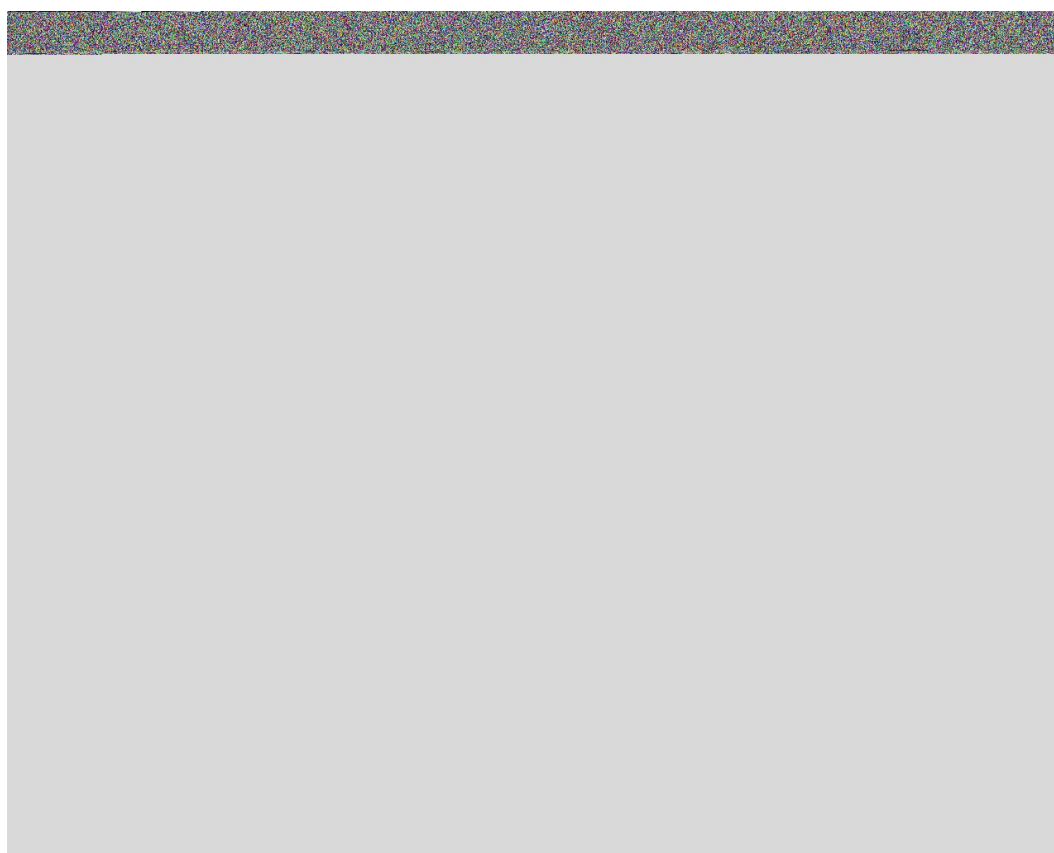

Figure S4-2 High resolution SEM image of Fig. 5(b)

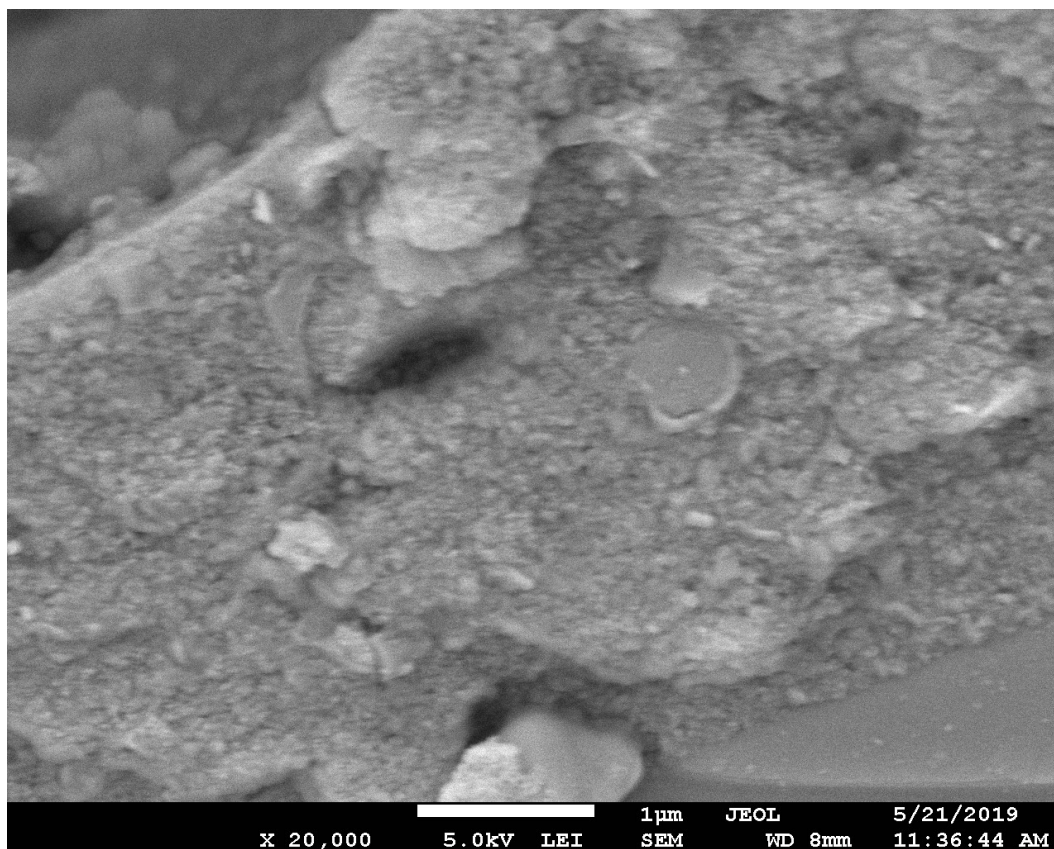

Figure S4-3 High resolution SEM image of Fig. 5(c)

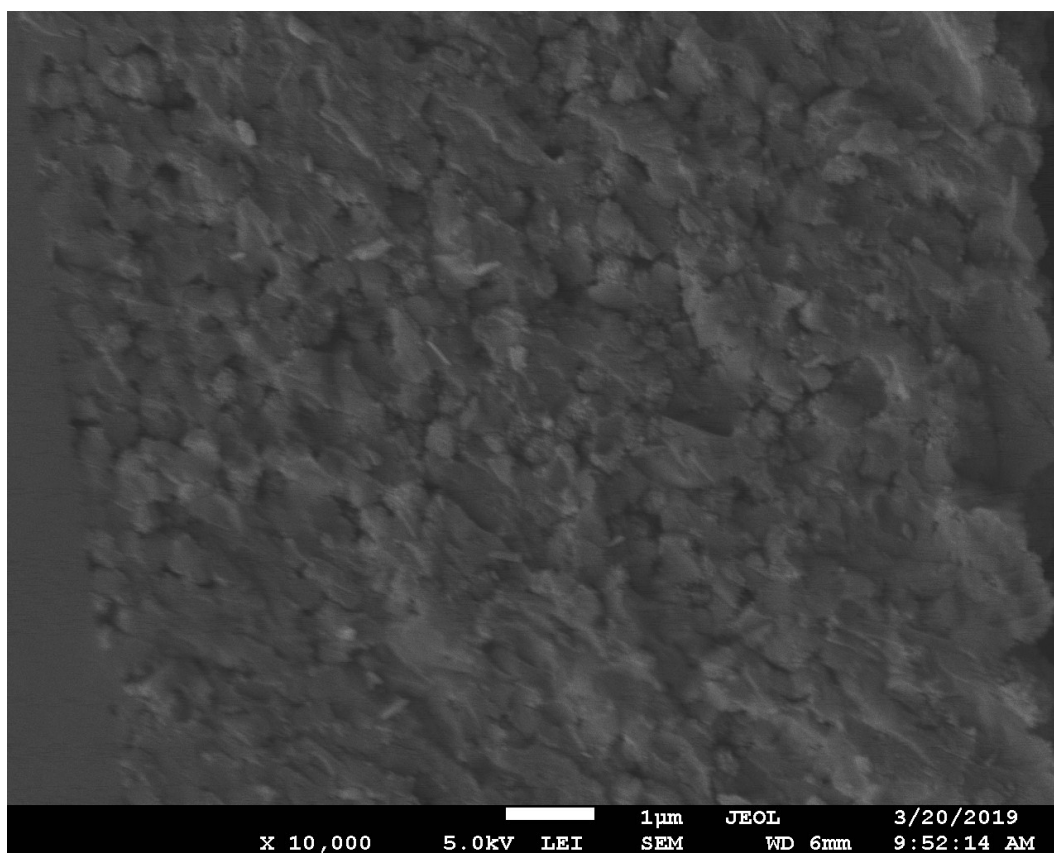

Figure S4-4 High resolution SEM image of Fig. 5(d)
